# Supplementary material for: Alternating chiral and achiral spacers for constructing two-dimensional chiral hybrid perovskites toward circular-polarization-sensitive photodetection
Source: Royal Society of Chemistry journal article supplement (doi:10.1039/d3mh00745f), 2023-01-01
Supplement: d3mh00745f1.pdf [file d3mh00745f1.pdf]

## *Supplementary Information*

### **Alternating Chiral and Achiral Spacers for Constructing Two-Dimensional Chiral Hybrid Perovskites toward Circular-Polarization-Sensitive Photodetection**

*Shihai You, Panpan Yu, Tingting Zhu, Qianwen Guan, Jianbo Wu, Hongliang Dai, Haiqing Zhong, Zeng-Kui Zhu, and Junhua Luo\**

\*E-mail: [jhluo@fjirsm.ac.cn](mailto:jhluo@fjirsm.ac.cn)

## Experimental

**Chemicals.** All starting materials, lead acetate trihydrate ( $\text{Pb}(\text{CH}_3\text{COO})_2 \cdot 3\text{H}_2\text{O}$ , 99.5%, Aladdin), hydrobromic acid solution (HBr, 40% in water, Aladdin), *R*- or *S*-1-phenylpropylamine (*R/S*-PPA, 98%, Aladdin), *n*-pentylamine (PA, 98%, Aladdin), and *N,N*-dimethylformamide (DMF, 99.8%, Aladdin) for target compounds synthesis were commercial available and used without further purification.

**Synthesis and Crystal Growth.**  $(\text{PA})_2\text{PbBr}_4$  (**1**). Microcrystals of **1** were synthesized by adding  $\text{Pb}(\text{CH}_3\text{COO})_2 \cdot 3\text{H}_2\text{O}$  (1 mmol, 379 mg) and PA (2 mmol, 174 mg) into 5 mL HBr solution (40% in water). The mixture was heated to boil under a constant magnetic stirring. After a colorless solution was obtained, the heating and stirring was stopped, and the mixture solution was left on the hotplate to cool to room temperature. Then colorless crystal plates were obtained.  $(R/S\text{-PPA})(\text{PA})\text{PbBr}_4$  (**2R/2S**). The synthesis for **2R** (or **2S**) is same as that of **1** by simply replacing 50% of PA with *R*-PPA (or *S*-PPA) (*i.e.*, PA (1 mmol, 87 mg) + *R*-PPA (1 mmol, 135 mg)). After the solution cooled to room temperature, the plate-like white microcrystals of **2R** or **2S** were obtained. The bulk single crystals of **2R** were grown from its HBr saturated solution containing stoichiometric raw chemicals through a slow temperature-cooling process in a program-controlled oven. The temperature range is 80°C to room temperature, while the decreasing rate was 1°C per day.

**Film Preparation.** The films of **2R/2S** on silica substrates were fabricated using a spin-coating technique. 0.15 g powders of **2R** (or **2S**) were dissolved in 0.66 g DMF, and then 2 droplets of **2R** (or **2S**) were dropped on the substrate. A rotate speed of 2,500 rpm and a holding time of 20 s were adopted. After coating, the films on silica were transferred on a hotplate of 80°C and kept for 5 min.

**Single-Crystal and Powder X-Ray Diffraction (XRD).** Single-crystal XRD measurements for **1**, **2R**, and **2S** were performed on a Rigaku XtaLAB Synergy R HyPix diffractometer with  $\text{Mo K}\alpha$  ( $\lambda = 0.71073 \text{ \AA}$ ). The crystal structures were solved by the direct method and refined by the full-matrix method based on  $F^2$  using the Olex2 software. Powder XRD patterns were measured on a Rigaku Miniflex 600 X-ray diffractometer in the  $2\theta$  range from 5° to 40° with a step length of 0.02°. CCDC 2252913-2252915 contain the supplementary crystallographic data for this paper.

**Optical Property Measurement.** The absorption spectra of **1** and **2R/2S** powders were recorded on a PerkinElmer Lambda 950 ultraviolet-visible-near-infrared (UV-vis-NIR) spectrometer from 200 to 800 nm with an interval of 1 nm.

**Circular Dichroism (CD) Measurement.** The **2R/2S** films were fabricated for CD measurement. The CD spectra of **2R/2S** were measured on a Bio-Logic MOS450 CD spectrometer. The pure silica substrate was used as the reference.

**Photodetection.** The **2R** single-crystal device was used for photodetection. A two-terminal planar structure was adopted with Ag electrodes depositing on the *ab* plane (Figure S9). The current-voltage (*I-V*) traces and current-time (*I-t*) curves were measured on a Keithley 6517B electrometer. The Thorlabs 405 nm fiber-pigtailed laser diode was used as the light source. The incident light power was calibrated using a PM100D optical power meter of Thorlabs. The circularly polarized lights were generated by using a polarizer and quarter-wave plates (Thorlabs).

**Density Functional Theory (DFT) Calculation.** The single-crystal structure of **2R** at 300 K was used for the theoretical calculations. The DFT calculations were carried out with the CASTEP program in the Materials Studio software. The exchange-correlation effects were treated by the Perdew-Burke-Ernzerhof function (PBE) in the generalized gradient approximation (GGA). A cutoff energy of 820 eV was used, and the *k*-space integration was carried out with a Monkhorst-Pack grid of 6×6×2. The norm-conserving pseudopotential was used to describe the interactions between the ionic cores and electrons. The spin-orbital coupling was not included. The orbital electrons of Pb ( $5d^{10}6s^26p^2$ ), Br ( $4s^24p^5$ ), C ( $2s^22p^2$ ), N ( $2s^22p^3$ ), and H ( $1s^1$ ) were regarded as valence electrons.

## Figures

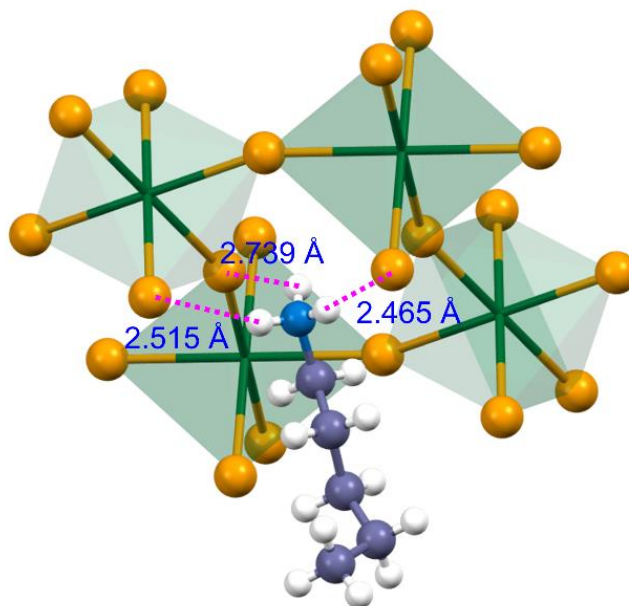

**Figure S1.** The hydrogen bonds in **1** crystal structure. (Pb: green, Br: yellow, N: Blue; C: Grey; H: White)

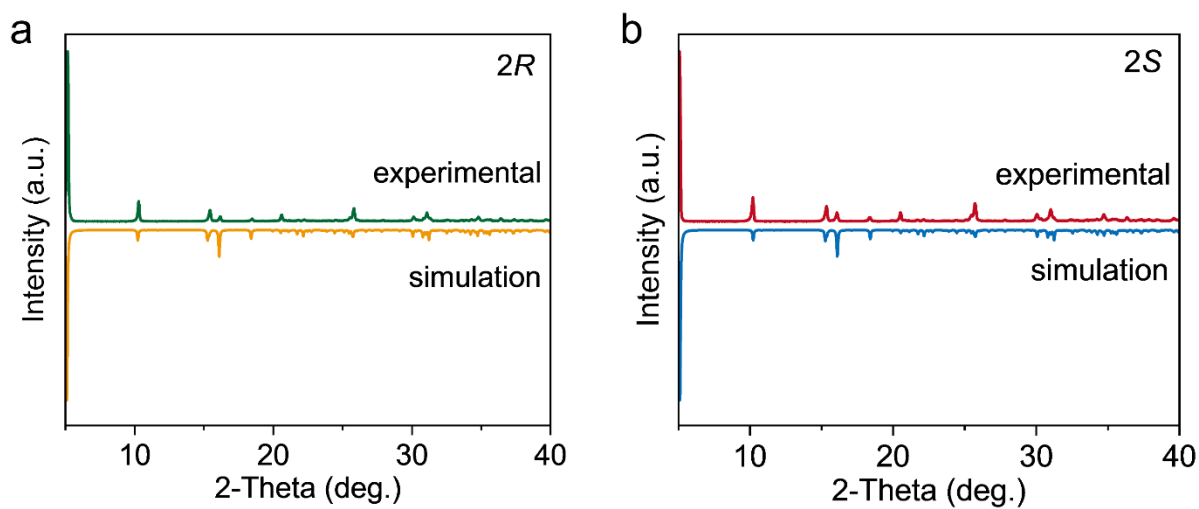

**Figure S2.** Experimental and simulated powder XRD patterns for (a) **2R** and (b) **2S**.

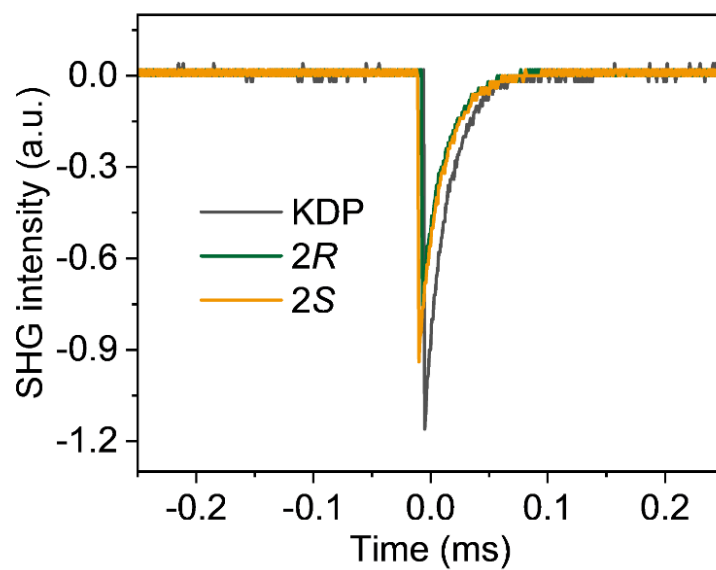

**Figure S3.** The SHG signals for **2R**, **2S**, and  $\text{KH}_2\text{PO}_4$  (KDP) powders.

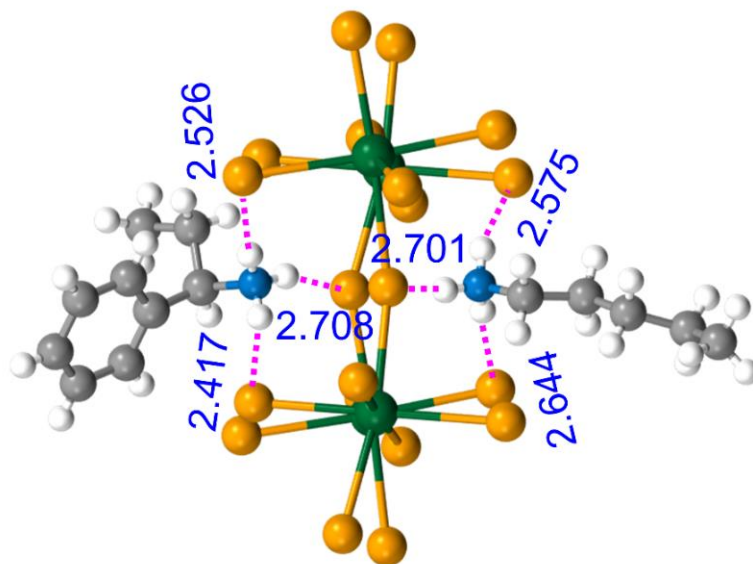

**Figure S4.** The hydrogen bonds in **2R** crystal structure (unit: Å). (Pb: green, Br: yellow, N: Blue; C: Grey; H: White)

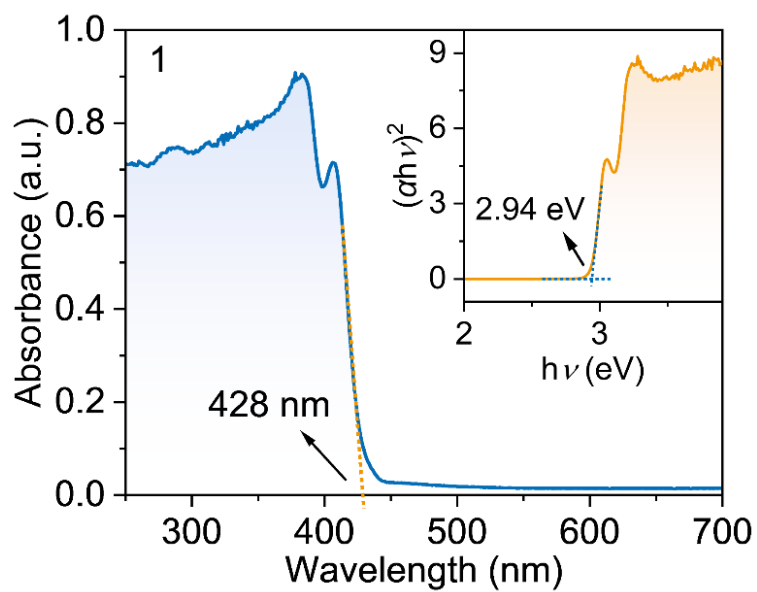

**Figure S5.** The absorption spectrum and estimated optical bandgap (inset) of **1**.

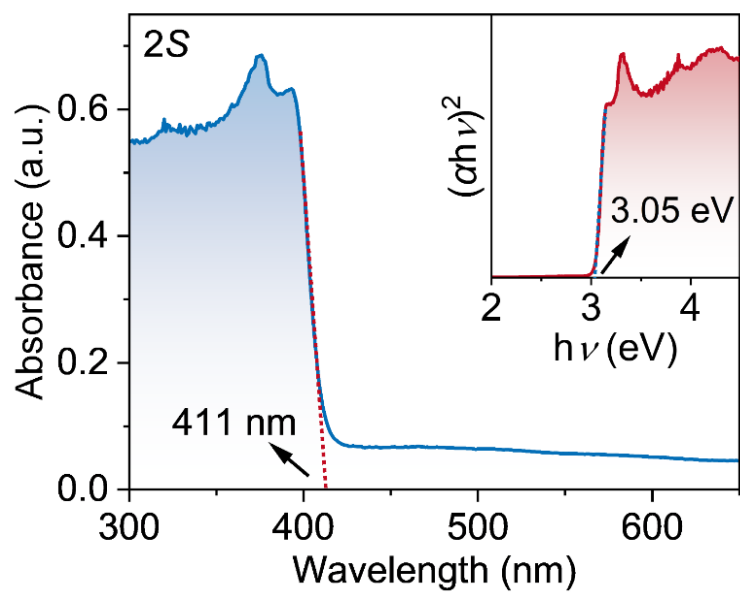

**Figure S6.** The absorption spectrum and estimated optical bandgap (inset) of **2S**.

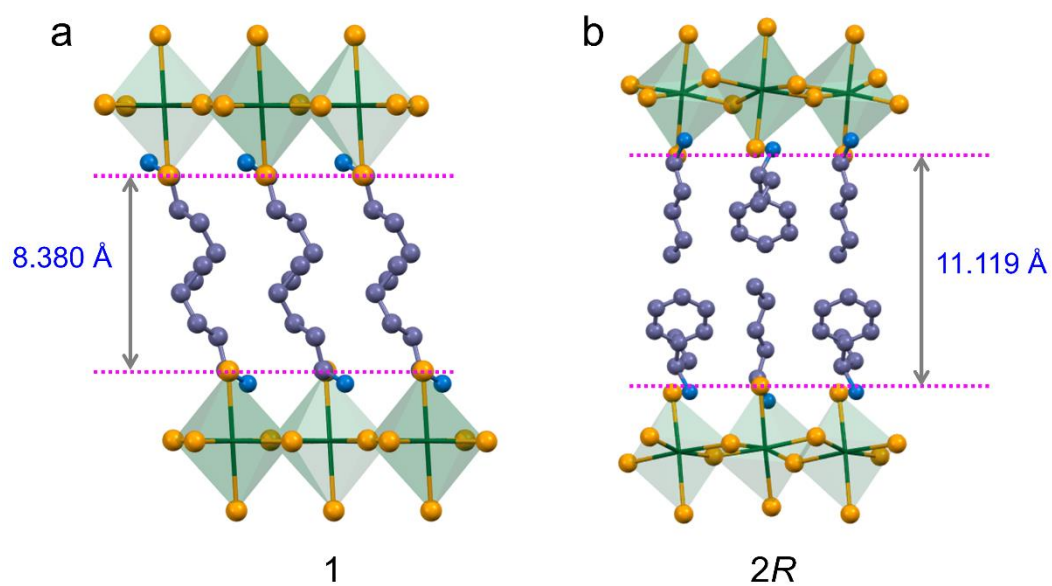

**Figure S7.** The interlayer distance for **1** and **2R**. (Pb: green, Br: yellow, N: Blue; C: Grey)

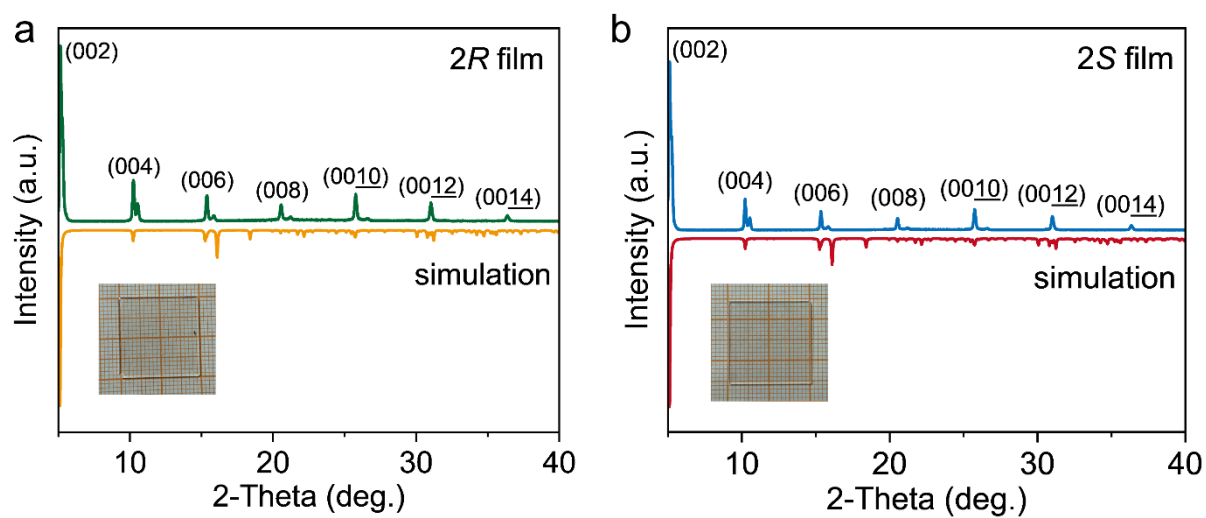

**Figure S8.** The PXRD patterns of **2R** and **2S** films. Insets are corresponding photons for **2R** and **2S** films, respectively.

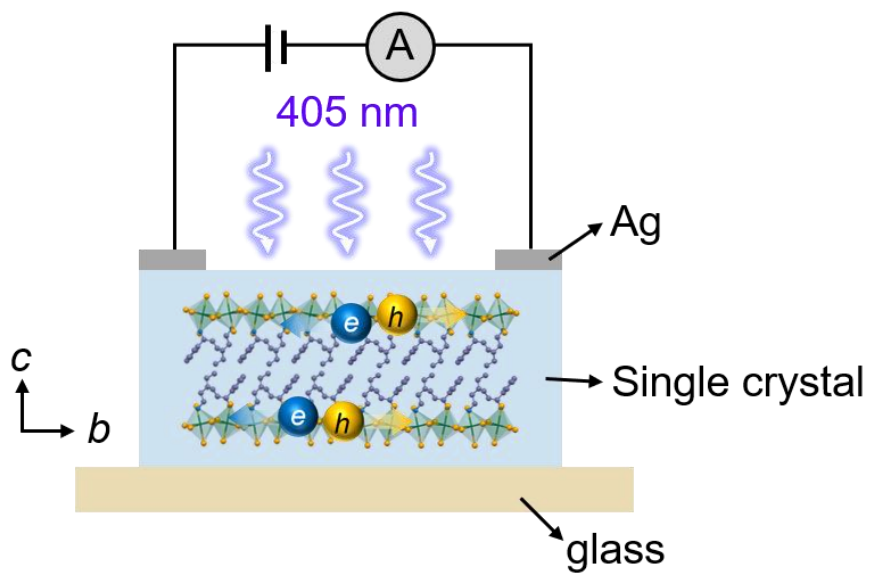

**Figure S9.** Schematic illustration of  $2R$  single-crystal photodetector.



## Tables

**Table S1.** Crystal data and refinement details for **1** and **2R/2S**.

| Identification code                                          | <b>1</b>                                                          | <b>2R</b>                                                                             | <b>2S</b>                                                                             |
|--------------------------------------------------------------|-------------------------------------------------------------------|---------------------------------------------------------------------------------------|---------------------------------------------------------------------------------------|
| Formula                                                      | (C <sub>5</sub> H <sub>14</sub> N) <sub>2</sub> PbBr <sub>4</sub> | (C <sub>9</sub> H <sub>14</sub> N)(C <sub>5</sub> H <sub>14</sub> N)PbBr <sub>4</sub> | (C <sub>9</sub> H <sub>14</sub> N)(C <sub>5</sub> H <sub>14</sub> N)PbBr <sub>4</sub> |
| Temperature [K]                                              | 100                                                               | 300                                                                                   | 300                                                                                   |
| Weight                                                       | 703.14                                                            | 751.21                                                                                | 751.21                                                                                |
| Crystal system                                               | Monoclinic                                                        | Orthorhombic                                                                          | Orthorhombic                                                                          |
| Space group                                                  | <i>P2<sub>1</sub>/c</i>                                           | <i>P2<sub>1</sub>2<sub>1</sub>2<sub>1</sub></i>                                       | <i>P2<sub>1</sub>2<sub>1</sub>2<sub>1</sub></i>                                       |
| <i>a</i> [Å]                                                 | 14.4011(5)                                                        | 8.0160(3)                                                                             | 8.0152(3)                                                                             |
| <i>b</i> [Å]                                                 | 8.2390(2)                                                         | 8.4161(4)                                                                             | 8.4073(3)                                                                             |
| <i>c</i> [Å]                                                 | 8.3208(2)                                                         | 34.5711(19)                                                                           | 34.5750(15)                                                                           |
| $\alpha$ [°]                                                 | 90                                                                | 90                                                                                    | 90                                                                                    |
| $\beta$ [°]                                                  | 94.932(3)                                                         | 90                                                                                    | 90                                                                                    |
| $\gamma$ [°]                                                 | 90                                                                | 90                                                                                    | 90                                                                                    |
| Volume [Å <sup>3</sup> ]                                     | 983.61(5)                                                         | 2332.29(19)                                                                           | 2329.88(16)                                                                           |
| $\rho$ [g cm <sup>-3</sup> ]                                 | 2.374                                                             | 2.139                                                                                 | 2.142                                                                                 |
| <i>Z</i>                                                     | 2                                                                 | 4                                                                                     | 4                                                                                     |
| <i>F</i> (000)                                               | 648                                                               | 1392                                                                                  | 1392                                                                                  |
| Radiation                                                    | Mo K $\alpha$ ( $\lambda$ = 0.71073)                              | Mo K $\alpha$ ( $\lambda$ = 0.71073)                                                  | Mo K $\alpha$ ( $\lambda$ = 0.71073)                                                  |
| Final <i>R</i> indexes [ <i>I</i> ≥ 2 $\sigma$ ( <i>I</i> )] | <i>R</i> <sub>1</sub> =2.96%, <i>wR</i> <sub>2</sub> =7.36%       | <i>R</i> <sub>1</sub> =4.58%, <i>wR</i> <sub>2</sub> =10.48%                          | <i>R</i> <sub>1</sub> =4.60%, <i>wR</i> <sub>2</sub> =11.10%                          |
| Final <i>R</i> indexes [all data]                            | <i>R</i> <sub>1</sub> =3.63%, <i>wR</i> <sub>2</sub> =7.61%       | <i>R</i> <sub>1</sub> =6.06%, <i>wR</i> <sub>2</sub> =10.99%                          | <i>R</i> <sub>1</sub> =5.97%, <i>wR</i> <sub>2</sub> =11.72%                          |
| GOF                                                          | 1.051                                                             | 1.051                                                                                 | 1.107                                                                                 |
